# Supplementary material for: MicroRNA-432 inhibits milk fat synthesis by targeting SCD and LPL in ovine mammary epithelial cells
Source: Royal Society of Chemistry journal article supplement (doi:10.1039/d1fo01260f), 2021-01-01
Supplement: d1fo01260f1.pdf [file d1fo01260f1.pdf]

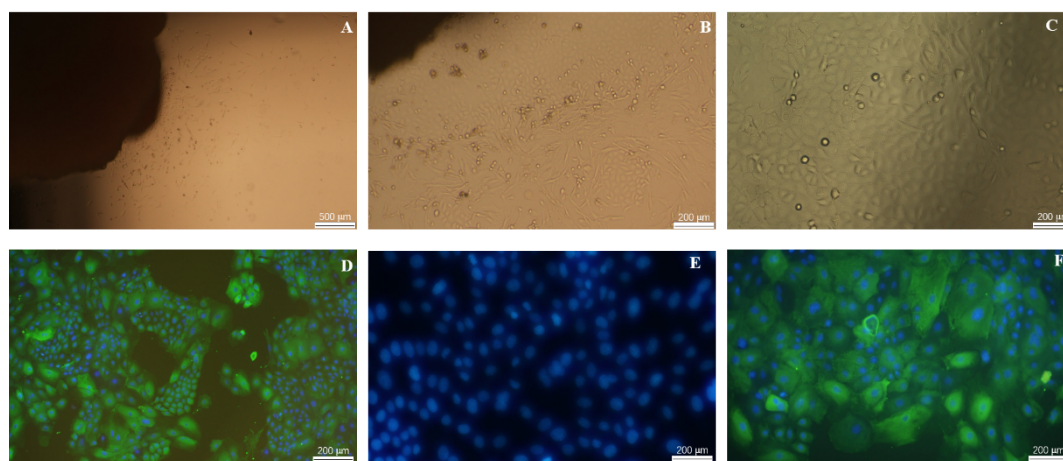

**Figure S1.** Characteristics of ovine mammary epithelial cells (OMECS). (A) Characteristics of parenchymal block of mammary gland on day 4 after cell culture. (B). Characteristics of parenchymal block of mammary gland on day 7 after cell culture. (C). The purified OMECs. (D). The expression and location of cytokeratin 18 in purified OMECs. (E). The expression and location of vimentin in purified OMECs. (F). The expression and location of  $\beta$ -casein in purified OMECs.
