# Supplementary material for: MicroRNA-432 inhibits milk fat synthesis by targeting SCD and LPL in ovine mammary epithelial cells
Source: Royal Society of Chemistry journal article supplement (doi:10.1039/d1fo01260f), 2021-01-01
Supplement: d1fo01260f2.pdf [file d1fo01260f2.pdf]

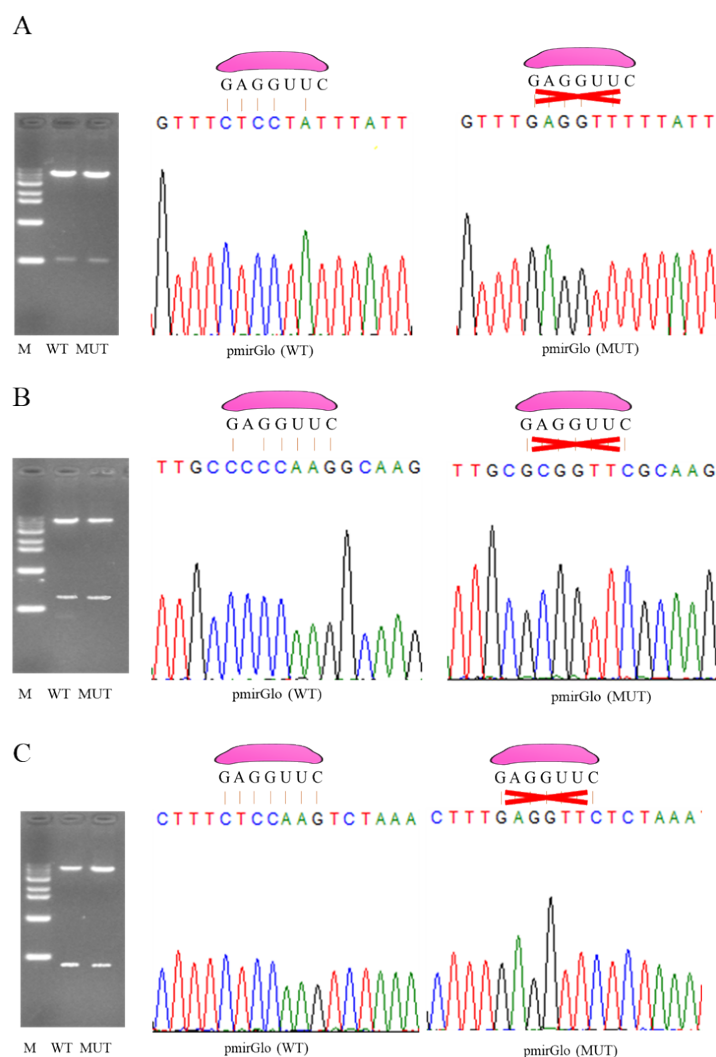

**Figure S2.** The wild-type (WT) and mutant (MUT) pmirGLO vector construction of the predicted target genes *FASN* (A), *SCD* (B) and *LPL* (C). The figure on the left indicates the results from agarose gel electrophoresis when WT and MUT pmirGLO vector were digested with the restriction endonucleases *SacI* and *XhoI*. The figure on the right shows the results from Sanger sequencing. The miR-432 is indicated with a pink irregular shape above sequencing figure.
