# Supplementary material for: MicroRNA-432 inhibits milk fat synthesis by targeting SCD and LPL in ovine mammary epithelial cells
Source: Royal Society of Chemistry journal article supplement (doi:10.1039/d1fo01260f), 2021-01-01
Supplement: d1fo01260f3.pdf [file d1fo01260f3.pdf]

**Table S1.** Sequence information of primers designed for PCR and RT-qPCR

| Name              | Primer  | Sequence                                   | Amlicon size (bp) | Gene ID        | Purpose of primers |
|-------------------|---------|--------------------------------------------|-------------------|----------------|--------------------|
| <i>FASN</i> (WT)  | Forward | CGAGCTCGCCCATAGGACCAGCACC                  | 509               | XM_027974304.1 | pmirGLO vector     |
|                   | Reverse | CCGCTCGAGAGAGCGAACGAGGGATTTA               |                   |                |                    |
| <i>FASN</i> (MUT) | Forward | GAGGTTTTTATTGCGTTGCCATGGGGGGCGGGG          | 607               | NM_001009254.1 |                    |
|                   | Reverse | CAACGCAATAAAAACCTCAAACAGAAAAACGACAACCACACC |                   |                |                    |
| <i>SCD</i> (WT)   | Forward | CGAGCTCGTTTCTGGTCCTTGGATT                  | 607               | NM_001009254.1 |                    |
|                   | Reverse | CCGCTCGAGGCCTTGTTCCCACTTCA                 |                   |                |                    |
| <i>SCD</i> (MUT)  | Forward | ATTGCGCGGTTTCGCAAGCAGTTGGTCAGTCATTG        | 435               | NM_001009394.1 |                    |
|                   | Reverse | CTTGCGAACC GCGCAATGAGGAGAAAGAGAAAGGAA      |                   |                |                    |
| <i>LPL</i> (WT)   | Forward | CGAGCTCTGAGGTGTATAGTGCCAAAT                | 435               | NM_001009394.1 |                    |
|                   | Reverse | CCGCTCGAGGATGCAACCAACCGTAGA                |                   |                |                    |
| <i>LPL</i> (MUT)  | Forward | GCTTTGAGGTCTCTAAATATAGAAAGTAGGATTTTTTGCAG  | 207               | NM_001009394.1 | RT-qPCR            |
|                   | Reverse | TTAGAGAACCTCAAAGCTTTGAGAAGGTTATCAACCTA     |                   |                |                    |
| <i>LPL</i>        | Forward | ACCTGAAGACTCGTTCTC                         | 207               | NM_001009394.1 | RT-qPCR            |
|                   | Reverse | CACCTCCGTGTAAAGTAG                         |                   |                |                    |
| <i>SCD</i>        | Forward | AGATTTATCCGACCTAAGAGC                      | 115               | NM_001009254.1 |                    |
|                   | Reverse | CCATAGATACCACGGCAC                         |                   |                |                    |
| <i>FABP4</i>      | Forward | TGTCCTTCAAATTGGGCCAGG                      | 187               | NM_001114667.1 |                    |
|                   | Reverse | AGCAGTGACACCGTTCATGAC                      |                   |                |                    |
| <i>LPINI</i>      | Forward | GACAACCCTGCCCTCATT                         | 176               | NM_001113773.1 |                    |
|                   | Reverse | CATCTTCCTCCCTTTCTGG                        |                   |                |                    |
| <i>ACACA</i>      | Forward | GTCCTCTGCCAGTTTCCC                         | 173               | NM_001009256.1 |                    |
|                   | Reverse | TCCATCACCACAGCCTTC                         |                   |                |                    |
| <i>β-actin</i>    | Forward | AGCCTTCCTTCCTGGGCATGGA                     | 113               | NM_001009784.3 |                    |
|                   | Reverse | GGACAGCACCGTGTGGCGTA                       |                   |                |                    |

Note: WT: The primers used for constructing wild-type (WT) pmirGLO vector.

MUT: The primers used for constructing mutated (MUT) pmirGLO vector.
